# Supplementary material
Source: bioRxiv or medRxiv preprint supplement (https://www.biorxiv.org/highwire/filestream/116568/field_highwire_adjunct_files/2/384131-3.pdf)
Supplement: Supplementary file [file 384131-3.pdf]

## Contents

|                                      |    |
|--------------------------------------|----|
| EB.....                              | 2  |
| Numbers of receptor and ligand ..... | 2  |
| Interactions.....                    | 2  |
| GO terms annotation .....            | 2  |
| Ros-E .....                          | 9  |
| Numbers of receptor and ligand ..... | 9  |
| Interactions.....                    | 9  |
| GO terms annotation .....            | 9  |
| Ros-L .....                          | 13 |
| Numbers of receptor and ligand ..... | 13 |
| Interactions.....                    | 13 |
| GO terms annotation .....            | 13 |
| NPCs.....                            | 17 |
| Numbers of receptor and ligand ..... | 17 |
| Interactions.....                    | 17 |
| GO terms annotation .....            | 17 |

## EB

### Numbers of receptor and ligand

| EB           | Receptors | Ligands | Total |
|--------------|-----------|---------|-------|
| Cluster_1    | 70        | 60      | 130   |
| Cluster_2    | 41        | 54      | 95    |
| Cluster_3    | 70        | 65      | 135   |
| <b>Total</b> | 181       | 179     | 360   |

### Interactions

| Receptors<br>Ligands  | Receptors |           |           |               |
|-----------------------|-----------|-----------|-----------|---------------|
|                       | Cluster_1 | Cluster_2 | Cluster_3 | Total ligands |
| Cluster_1             |           | 40        | 69        | 109           |
| Cluster_2             | 40        |           | 47        | 87            |
| Cluster_3             | 65        | 43        |           | 108           |
| <b>Total receptor</b> | 105       | 83        | 116       | 304           |

### GO terms annotation

|                        |              |                               |                                                                                                                                                                                                  |
|------------------------|--------------|-------------------------------|--------------------------------------------------------------------------------------------------------------------------------------------------------------------------------------------------|
| <u>ENSG00000078401</u> | <u>EDN1</u>  | neural crest cell development | "The process aimed at the progression of a neural crest cell over time, from initial commitment of the cell to its specific fate, to the fully functional differentiated cell." [GOC:dh, GOC:ef] |
| <u>ENSG00000162344</u> | <u>FGF19</u> | neural crest cell migration   | "The characteristic movement of cells from the dorsal ridge of the neural tube to a variety of locations in a vertebrate embryo." [GOC:ascb_2009, GOC:dph, GOC:tb,                               |

|                        |              |                                                      |                                                                                                                                                                                                                                                                                                                                                                                                                 |
|------------------------|--------------|------------------------------------------------------|-----------------------------------------------------------------------------------------------------------------------------------------------------------------------------------------------------------------------------------------------------------------------------------------------------------------------------------------------------------------------------------------------------------------|
|                        |              |                                                      | ISBN:0878932437]                                                                                                                                                                                                                                                                                                                                                                                                |
| <u>ENSG00000169242</u> | <u>EFNA1</u> | notochord formation                                  | "The formation of the notochord from the chordamesoderm. The notochord is composed of large cells packed within a firm connective tissue sheath and is found in all chordates at the ventral surface of the neural tube. In vertebrates, the notochord contributes to the vertebral column." [GOC:dh, GOC:ef]                                                                                                   |
| <u>ENSG00000136160</u> | <u>EDNRB</u> | neural crest cell migration                          | "The characteristic movement of cells from the dorsal ridge of the neural tube to a variety of locations in a vertebrate embryo." [GOC:ascb_2009, GOC:dph, GOC:tb, ISBN:0878932437]                                                                                                                                                                                                                             |
| <u>ENSG00000064300</u> | <u>NGFR</u>  | negative regulation of neuron projection development | "Any process that decreases the rate, frequency or extent of neuron projection development. Neuron projection development is the process whose specific outcome is the progression of a neuron projection over time, from its formation to the mature structure. A neuron projection is any process extending from a neural cell, such as axons or dendrites (collectively called neurites)." [GOC:dph, GOC:tb] |
| <u>ENSG00000107831</u> | <u>FGF8</u>  | neural plate morphogenesis                           | "The process in which the anatomical structures of the neural plate are generated and organized. The neural plate is a specialized region of columnar epithelial cells in the dorsal ectoderm that will give rise to nervous system tissue." [GOC:dph,                                                                                                                                                          |

|                        |              |                                                              |                                                                                                                                                                                                                                                                                                                                                                                                                 |
|------------------------|--------------|--------------------------------------------------------------|-----------------------------------------------------------------------------------------------------------------------------------------------------------------------------------------------------------------------------------------------------------------------------------------------------------------------------------------------------------------------------------------------------------------|
|                        |              |                                                              | ISBN:0878932437]                                                                                                                                                                                                                                                                                                                                                                                                |
| <u>ENSG00000114251</u> | <u>WNT5A</u> | positive regulation of neuron projection development         | "Any process that increases the rate, frequency or extent of neuron projection development. Neuron projection development is the process whose specific outcome is the progression of a neuron projection over time, from its formation to the mature structure. A neuron projection is any process extending from a neural cell, such as axons or dendrites (collectively called neurites)." [GOC:dph, GOC:tb] |
| <u>ENSG00000125266</u> | <u>EFNB2</u> | negative regulation of neuron projection development         | "Any process that decreases the rate, frequency or extent of neuron projection development. Neuron projection development is the process whose specific outcome is the progression of a neuron projection over time, from its formation to the mature structure. A neuron projection is any process extending from a neural cell, such as axons or dendrites (collectively called neurites)." [GOC:dph, GOC:tb] |
| <u>ENSG00000180340</u> | <u>FZD2</u>  | planar cell polarity pathway involved in neural tube closure | "The series of molecular signals initiated by binding of a Wnt protein to a receptor on the surface of the target cell where activated receptors signal via downstream effectors that modulates the establishment of planar polarity contributing to neural tube closure." [GOC:ascb_2009, GOC:dph, GOC:tb]                                                                                                     |
| <u>ENSG00000101384</u> | <u>JAG1</u>  | cardiac neural                                               | "The process aimed at the                                                                                                                                                                                                                                                                                                                                                                                       |

|                        |              |                                                                |                                                                                                                                                                                                                                                                   |
|------------------------|--------------|----------------------------------------------------------------|-------------------------------------------------------------------------------------------------------------------------------------------------------------------------------------------------------------------------------------------------------------------|
|                        |              | crest cell development involved in outflow tract morphogenesis | progression of a cardiac neural crest cell over time, from initial commitment of the cell to its specific fate, to the fully functional differentiated cell that contributes to the shaping of the outflow tract."<br>[GOC:dph, GOC:mtg_heart]                    |
| <u>ENSG00000090932</u> | <u>DLL3</u>  | paraxial mesoderm development                                  | "The process whose specific outcome is the progression of the paraxial mesoderm over time, from its formation to the mature structure. The paraxial mesoderm is the mesoderm located bilaterally adjacent to the notochord and neural tube." [GOC:dgh]            |
| <u>ENSG00000090776</u> | <u>EFNB1</u> | neural crest cell migration                                    | "The characteristic movement of cells from the dorsal ridge of the neural tube to a variety of locations in a vertebrate embryo." [GOC:ascb_2009, GOC:dph, GOC:tb, ISBN:0878932437]                                                                               |
| <u>ENSG00000101144</u> | <u>BMP7</u>  | neural fold elevation formation                                | "The process in which the lateral borders of the neural plate begin to migrate upwards to form the neural folds, caused by the proliferation of the underlying mesoderm."<br>[GO_REF:0000021, GOC:cls, GOC:dgh, GOC:dph, GOC:jid, GOC:mtg_15jun06, PMID:15806586] |
| <u>ENSG00000164930</u> | <u>FZD6</u>  | neural tube closure                                            | "The last step in the formation of the neural tube, where the paired neural folds are brought together and fuse at the dorsal midline." [GOC:dph, ISBN:0878932437]                                                                                                |
| <u>ENSG00000115170</u> | <u>ACVR1</u> | neural crest cell migration                                    | "The characteristic movement of cells from the dorsal ridge of the neural tube to a variety of locations in a vertebrate                                                                                                                                          |

|                        |               |                                                      |                                                                                                                                                                                                                                                                                                                                                                                                                 |
|------------------------|---------------|------------------------------------------------------|-----------------------------------------------------------------------------------------------------------------------------------------------------------------------------------------------------------------------------------------------------------------------------------------------------------------------------------------------------------------------------------------------------------------|
|                        |               |                                                      | embryo." [GOC:ascb_2009, GOC:dph, GOC:tb, ISBN:0878932437]                                                                                                                                                                                                                                                                                                                                                      |
| <u>ENSG00000107779</u> | <u>BMPR1A</u> | neural crest cell development                        | "The process aimed at the progression of a neural crest cell over time, from initial commitment of the cell to its specific fate, to the fully functional differentiated cell." [GOC:dh, GOC:ef]                                                                                                                                                                                                                |
| <u>ENSG00000185652</u> | <u>NTF3</u>   | neuron projection morphogenesis                      | "The process in which the anatomical structures of a neuron projection are generated and organized. A neuron projection is any process extending from a neural cell, such as axons or dendrites." [GOC:mah]                                                                                                                                                                                                     |
| <u>ENSG00000077782</u> | <u>FGFR1</u>  | chordate embryonic development                       | "The process whose specific outcome is the progression of the embryo over time, from zygote formation through a stage including a notochord and neural tube until birth or egg hatching." [GOC:mtg_sensu]                                                                                                                                                                                                       |
| <u>ENSG00000116106</u> | <u>EPHA4</u>  | negative regulation of neuron projection development | "Any process that decreases the rate, frequency or extent of neuron projection development. Neuron projection development is the process whose specific outcome is the progression of a neuron projection over time, from its formation to the mature structure. A neuron projection is any process extending from a neural cell, such as axons or dendrites (collectively called neurites)." [GOC:dph, GOC:tb] |
| <u>ENSG00000170989</u> | <u>S1PR1</u>  | brain development                                    | "The process whose specific outcome is the progression of the brain over time, from its                                                                                                                                                                                                                                                                                                                         |

|                        |              |                     |                                                                                                                                                                                                                                                                                                                                                                                                                                                                                                           |
|------------------------|--------------|---------------------|-----------------------------------------------------------------------------------------------------------------------------------------------------------------------------------------------------------------------------------------------------------------------------------------------------------------------------------------------------------------------------------------------------------------------------------------------------------------------------------------------------------|
|                        |              |                     | <p>formation to the mature structure. Brain development begins with patterning events in the neural tube and ends with the mature structure that is the center of thought and emotion. The brain is responsible for the coordination and control of bodily activities and the interpretation of information from the senses (sight, hearing, smell, etc.)."</p> <p>[GOC:dph, GOC:jid, GOC:tb, UBERON:0000955]</p>                                                                                         |
| <u>ENSG00000135333</u> | <u>EPHA7</u> | brain development   | <p>"The process whose specific outcome is the progression of the brain over time, from its formation to the mature structure. Brain development begins with patterning events in the neural tube and ends with the mature structure that is the center of thought and emotion. The brain is responsible for the coordination and control of bodily activities and the interpretation of information from the senses (sight, hearing, smell, etc.)."</p> <p>[GOC:dph, GOC:jid, GOC:tb, UBERON:0000955]</p> |
| <u>ENSG00000104290</u> | <u>FZD3</u>  | neural tube closure | <p>"The last step in the formation of the neural tube, where the paired neural folds are brought together and fuse at the dorsal midline." [GOC:dph, ISBN:0878932437]</p>                                                                                                                                                                                                                                                                                                                                 |
| <u>ENSG00000142627</u> | <u>EPHA2</u> | notochord formation | <p>"The formation of the notochord from the chordamesoderm. The notochord is composed of large cells packed within a</p>                                                                                                                                                                                                                                                                                                                                                                                  |

|                        |            |                   |                                                                                                                                                                                                                                                                                                                                                                                                                                                                                             |
|------------------------|------------|-------------------|---------------------------------------------------------------------------------------------------------------------------------------------------------------------------------------------------------------------------------------------------------------------------------------------------------------------------------------------------------------------------------------------------------------------------------------------------------------------------------------------|
|                        |            |                   | firm connective tissue sheath and is found in all chordates at the ventral surface of the neural tube. In vertebrates, the notochord contributes to the vertebral column." [GOC:dh, GOC:ef]                                                                                                                                                                                                                                                                                                 |
| <u>ENSG00000105894</u> | <u>PTN</u> | brain development | "The process whose specific outcome is the progression of the brain over time, from its formation to the mature structure. Brain development begins with patterning events in the neural tube and ends with the mature structure that is the center of thought and emotion. The brain is responsible for the coordination and control of bodily activities and the interpretation of information from the senses (sight, hearing, smell, etc.)." [GOC:dph, GOC:jid, GOC:tb, UBERON:0000955] |



## Ros-E

### Numbers of receptor and ligand

| Ros-E(182, 55) | Receptor  | Ligand     | total      |
|----------------|-----------|------------|------------|
| Cluster_1      | 35        | 59         | 94         |
| Cluster_2      | 34        | 54         | 88         |
| <b>Total</b>   | <b>69</b> | <b>113</b> | <b>182</b> |

### Interactions

| Ligand \ Receptor     | Receptor  |           |              |
|-----------------------|-----------|-----------|--------------|
|                       | Cluster_1 | Cluster_2 | Total ligand |
| Cluster_1             |           | 29        | 29           |
| Cluster_2             | 26        |           | 26           |
| <b>Total receptor</b> | <b>26</b> | <b>29</b> | <b>55</b>    |

### GO terms annotation

|                        |              |                               |                                                                                                                                                                                                  |
|------------------------|--------------|-------------------------------|--------------------------------------------------------------------------------------------------------------------------------------------------------------------------------------------------|
| <u>ENSG00000078401</u> | <u>EDN1</u>  | neural crest cell development | "The process aimed at the progression of a neural crest cell over time, from initial commitment of the cell to its specific fate, to the fully functional differentiated cell." [GOC:dh, GOC:ef] |
| <u>ENSG00000162344</u> | <u>FGF19</u> | neural crest cell migration   | "The characteristic movement of cells from the dorsal ridge of the neural tube to a variety of locations in a vertebrate embryo." [GOC:ascb_2009, GOC:dph, GOC:tb, ISBN:0878932437]              |
| <u>ENSG00000169242</u> | <u>EFNA1</u> | notochord formation           | "The formation of the notochord from the chordamesoderm. The notochord is composed of large                                                                                                      |

|                        |              |                                                      |                                                                                                                                                                                                                                                                                                                                                                                                                 |
|------------------------|--------------|------------------------------------------------------|-----------------------------------------------------------------------------------------------------------------------------------------------------------------------------------------------------------------------------------------------------------------------------------------------------------------------------------------------------------------------------------------------------------------|
|                        |              |                                                      | cells packed within a firm connective tissue sheath and is found in all chordates at the ventral surface of the neural tube. In vertebrates, the notochord contributes to the vertebral column." [GOC:dh, GOC:ef]                                                                                                                                                                                               |
| <u>ENSG00000136160</u> | <u>EDNRB</u> | neural crest cell migration                          | "The characteristic movement of cells from the dorsal ridge of the neural tube to a variety of locations in a vertebrate embryo." [GOC:ascb_2009, GOC:dph, GOC:tb, ISBN:0878932437]                                                                                                                                                                                                                             |
| <u>ENSG00000114251</u> | <u>WNT5A</u> | positive regulation of neuron projection development | "Any process that increases the rate, frequency or extent of neuron projection development. Neuron projection development is the process whose specific outcome is the progression of a neuron projection over time, from its formation to the mature structure. A neuron projection is any process extending from a neural cell, such as axons or dendrites (collectively called neurites)." [GOC:dph, GOC:tb] |
| <u>ENSG00000125266</u> | <u>EFNB2</u> | negative regulation of neuron projection development | "Any process that decreases the rate, frequency or extent of neuron projection development. Neuron projection development is the process whose specific outcome is the progression of a neuron projection over time, from its formation to the mature structure. A neuron projection is any process extending from a neural cell, such as axons or dendrites (collectively called neurites)." [GOC:dph, GOC:tb] |
| <u>ENSG00000180340</u> | <u>FZD2</u>  | planar cell polarity pathway                         | "The series of molecular signals initiated by binding of a Wnt protein to a receptor on the                                                                                                                                                                                                                                                                                                                     |

|                        |              |                                                      |                                                                                                                                                                                                                                                                                                                                                                                                                 |
|------------------------|--------------|------------------------------------------------------|-----------------------------------------------------------------------------------------------------------------------------------------------------------------------------------------------------------------------------------------------------------------------------------------------------------------------------------------------------------------------------------------------------------------|
|                        |              | involved in neural tube closure                      | surface of the target cell where activated receptors signal via downstream effectors that modulates the establishment of planar polarity contributing to neural tube closure."<br>[GOC:ascb_2009, GOC:dph, GOC:tb]                                                                                                                                                                                              |
| <u>ENSG00000090932</u> | <u>DLL3</u>  | paraxial mesoderm development                        | "The process whose specific outcome is the progression of the paraxial mesoderm over time, from its formation to the mature structure. The paraxial mesoderm is the mesoderm located bilaterally adjacent to the notochord and neural tube."<br>[GOC:dgh]                                                                                                                                                       |
| <u>ENSG00000125378</u> | <u>BMP4</u>  | neural tube closure                                  | "The last step in the formation of the neural tube, where the paired neural folds are brought together and fuse at the dorsal midline."<br>[GOC:dph, ISBN:0878932437]                                                                                                                                                                                                                                           |
| <u>ENSG00000164930</u> | <u>FZD6</u>  | neural tube closure                                  | "The last step in the formation of the neural tube, where the paired neural folds are brought together and fuse at the dorsal midline."<br>[GOC:dph, ISBN:0878932437]                                                                                                                                                                                                                                           |
| <u>ENSG00000077782</u> | <u>FGFR1</u> | positive regulation of neuron differentiation        | "Any process that activates or increases the frequency, rate or extent of neuron differentiation."<br>[GOC:go_curators]                                                                                                                                                                                                                                                                                         |
| <u>ENSG00000116106</u> | <u>EPHA4</u> | negative regulation of neuron projection development | "Any process that decreases the rate, frequency or extent of neuron projection development. Neuron projection development is the process whose specific outcome is the progression of a neuron projection over time, from its formation to the mature structure. A neuron projection is any process extending from a neural cell, such as axons or dendrites (collectively called neurites)." [GOC:dph, GOC:tb] |

|                        |              |                     |                                                                                                                                                                                                                                                                                                                                                                                                                                                                                             |
|------------------------|--------------|---------------------|---------------------------------------------------------------------------------------------------------------------------------------------------------------------------------------------------------------------------------------------------------------------------------------------------------------------------------------------------------------------------------------------------------------------------------------------------------------------------------------------|
| <u>ENSG00000170989</u> | <u>S1PR1</u> | brain development   | "The process whose specific outcome is the progression of the brain over time, from its formation to the mature structure. Brain development begins with patterning events in the neural tube and ends with the mature structure that is the center of thought and emotion. The brain is responsible for the coordination and control of bodily activities and the interpretation of information from the senses (sight, hearing, smell, etc.)." [GOC:dph, GOC:jid, GOC:tb, UBERON:0000955] |
| <u>ENSG00000104290</u> | <u>FZD3</u>  | neural tube closure | "The last step in the formation of the neural tube, where the paired neural folds are brought together and fuse at the dorsal midline." [GOC:dph, ISBN:0878932437]                                                                                                                                                                                                                                                                                                                          |
| <u>ENSG00000142627</u> | <u>EPHA2</u> | notochord formation | "The formation of the notochord from the chordamesoderm. The notochord is composed of large cells packed within a firm connective tissue sheath and is found in all chordates at the ventral surface of the neural tube. In vertebrates, the notochord contributes to the vertebral column." [GOC:dh, GOC:ef]                                                                                                                                                                               |

## Ros-L

### Numbers of receptor and ligand

| Ros-L        | Receptor | Ligand | Total |
|--------------|----------|--------|-------|
| Cluster_1    | 31       | 56     | 87    |
| Cluster_2    | 32       | 47     | 79    |
| Cluster_3    | 34       | 61     | 95    |
| <b>Total</b> | 97       | 164    | 261   |

### Interactions

| Receptor<br>Ligand    | Receptor  |           |           |              |
|-----------------------|-----------|-----------|-----------|--------------|
|                       | Cluster_1 | Cluster_2 | Cluster_3 | Total ligand |
| Cluster_1             |           | 27        | 25        | 52           |
| Cluster_2             | 13        |           | 17        | 30           |
| Cluster_3             | 19        | 23        |           | 42           |
| <b>Total receptor</b> | 32        | 50        | 42        | 124          |

### GO terms annotation

|                        |             |                                                           |                                                                                                                                                                                                     |
|------------------------|-------------|-----------------------------------------------------------|-----------------------------------------------------------------------------------------------------------------------------------------------------------------------------------------------------|
| <u>ENSG00000078401</u> | <u>EDN1</u> | neural crest cell development                             | "The process aimed at the progression of a neural crest cell over time, from initial commitment of the cell to its specific fate, to the fully functional differentiated cell."<br>[GOC:dh, GOC:ef] |
| <u>ENSG00000099250</u> | <u>NRP1</u> | neural crest cell migration involved in autonomic nervous | "Any neural crest cell migration that is involved in autonomic nervous system development."<br>[GOC:BHF, GOC:TermGenie]                                                                             |

|                        |              |                                                              |                                                                                                                                                                                                                                                                                                                                                                                                                                                                                                                                                                               |
|------------------------|--------------|--------------------------------------------------------------|-------------------------------------------------------------------------------------------------------------------------------------------------------------------------------------------------------------------------------------------------------------------------------------------------------------------------------------------------------------------------------------------------------------------------------------------------------------------------------------------------------------------------------------------------------------------------------|
|                        |              | system development                                           |                                                                                                                                                                                                                                                                                                                                                                                                                                                                                                                                                                               |
| <u>ENSG00000114251</u> | <u>WNT5A</u> | positive regulation of neuron projection development         | "Any process that increases the rate, frequency or extent of neuron projection development. Neuron projection development is the process whose specific outcome is the progression of a neuron projection over time, from its formation to the mature structure. A neuron projection is any process extending from a neural cell, such as axons or dendrites (collectively called neurites)." [GOC:dph, GOC:tb]                                                                                                                                                               |
| <u>ENSG00000180340</u> | <u>FZD2</u>  | planar cell polarity pathway involved in neural tube closure | "The series of molecular signals initiated by binding of a Wnt protein to a receptor on the surface of the target cell where activated receptors signal via downstream effectors that modulates the establishment of planar polarity contributing to neural tube closure." [GOC:ascb_2009, GOC:dph, GOC:tb]                                                                                                                                                                                                                                                                   |
| <u>ENSG00000151617</u> | <u>EDNRA</u> | enteric nervous system development                           | "The process whose specific outcome is the progression of the enteric nervous system over time, from its formation to the mature structure. The enteric nervous system is composed of two ganglionated neural plexuses in the gut wall which form one of the three major divisions of the autonomic nervous system. The enteric nervous system innervates the gastrointestinal tract, the pancreas, and the gall bladder. It contains sensory neurons, interneurons, and motor neurons. Thus the circuitry can autonomously sense the tension and the chemical environment in |

|                        |             |                                                              |                                                                                                                                                                                                                                                                                                                                                                                                                                                                                             |
|------------------------|-------------|--------------------------------------------------------------|---------------------------------------------------------------------------------------------------------------------------------------------------------------------------------------------------------------------------------------------------------------------------------------------------------------------------------------------------------------------------------------------------------------------------------------------------------------------------------------------|
|                        |             |                                                              | the gut and regulate blood vessel tone, motility, secretions, and fluid transport. The system is itself governed by the central nervous system and receives both parasympathetic and sympathetic innervation." [FMA:66070, GOC:jid, GOC:sr]                                                                                                                                                                                                                                                 |
| <u>ENSG00000125378</u> | <u>BMP4</u> | neural tube closure                                          | "The last step in the formation of the neural tube, where the paired neural folds are brought together and fuse at the dorsal midline." [GOC:dph, ISBN:0878932437]                                                                                                                                                                                                                                                                                                                          |
| <u>ENSG00000148926</u> | <u>ADM</u>  | neural tube closure                                          | "The last step in the formation of the neural tube, where the paired neural folds are brought together and fuse at the dorsal midline." [GOC:dph, ISBN:0878932437]                                                                                                                                                                                                                                                                                                                          |
| <u>ENSG00000187266</u> | <u>EPOR</u> | brain development                                            | "The process whose specific outcome is the progression of the brain over time, from its formation to the mature structure. Brain development begins with patterning events in the neural tube and ends with the mature structure that is the center of thought and emotion. The brain is responsible for the coordination and control of bodily activities and the interpretation of information from the senses (sight, hearing, smell, etc.)." [GOC:dph, GOC:jid, GOC:tb, UBERON:0000955] |
| <u>ENSG00000157240</u> | <u>FZD1</u> | planar cell polarity pathway involved in neural tube closure | "The series of molecular signals initiated by binding of a Wnt protein to a receptor on the surface of the target cell where activated receptors signal via downstream effectors that modulates the establishment of planar polarity contributing to neural tube closure." [GOC:ascb_2009, GOC:dph,                                                                                                                                                                                         |

|                        |              |                                      |                                                                                                                                                                                                                                                                                                                                                                                                                                                                                                |
|------------------------|--------------|--------------------------------------|------------------------------------------------------------------------------------------------------------------------------------------------------------------------------------------------------------------------------------------------------------------------------------------------------------------------------------------------------------------------------------------------------------------------------------------------------------------------------------------------|
|                        |              |                                      | GOC:tb]                                                                                                                                                                                                                                                                                                                                                                                                                                                                                        |
| <u>ENSG00000077782</u> | <u>FGFR1</u> | chordate<br>embryonic<br>development | "The process whose specific outcome is the progression of the embryo over time, from zygote formation through a stage including a notochord and neural tube until birth or egg hatching."<br>[GOC:mtg_sensu]                                                                                                                                                                                                                                                                                   |
| <u>ENSG00000170989</u> | <u>S1PR1</u> | brain<br>development                 | "The process whose specific outcome is the progression of the brain over time, from its formation to the mature structure. Brain development begins with patterning events in the neural tube and ends with the mature structure that is the center of thought and emotion. The brain is responsible for the coordination and control of bodily activities and the interpretation of information from the senses (sight, hearing, smell, etc.)."<br>[GOC:dph, GOC:jid, GOC:tb, UBERON:0000955] |



## NPCs

### Numbers of receptor and ligand

| NPCs         | Receptor | Ligand | Total |
|--------------|----------|--------|-------|
| Cluster_1    | 40       | 55     | 95    |
| Cluster_2    | 44       | 61     | 105   |
| Cluster_3    | 44       | 63     | 107   |
| <b>Total</b> | 128      | 179    | 307   |

### Interactions

| Receptor \ Ligand | Cluster_1 | Cluster_2 | Cluster_3 | Total ligand |
|-------------------|-----------|-----------|-----------|--------------|
| Cluster_1         |           | 26        | 31        | 57           |
| Cluster_2         | 24        |           | 34        | 58           |
| Cluster_3         | 23        | 24        |           | 47           |
| Total receptor    | 47        | 50        | 65        | 162          |

### GO terms annotation

|                        |             |                               |                                                                                                                                                                                                     |
|------------------------|-------------|-------------------------------|-----------------------------------------------------------------------------------------------------------------------------------------------------------------------------------------------------|
| <u>ENSG00000078401</u> | <u>EDN1</u> | neural crest cell development | "The process aimed at the progression of a neural crest cell over time, from initial commitment of the cell to its specific fate, to the fully functional differentiated cell."<br>[GOC:dh, GOC:ef] |
|                        |             | rhythmic excitation           | "Any process involved in the generation of rhythmic, synchronous excitatory                                                                                                                         |

|                        |              |                                                      |                                                                                                                                                                                                                                                                                                                                                                                                                    |
|------------------------|--------------|------------------------------------------------------|--------------------------------------------------------------------------------------------------------------------------------------------------------------------------------------------------------------------------------------------------------------------------------------------------------------------------------------------------------------------------------------------------------------------|
|                        |              |                                                      | synaptic inputs in a neural circuit."<br>[GOC:go_curators, ISBN:0195088433]                                                                                                                                                                                                                                                                                                                                        |
| <u>ENSG00000169242</u> | <u>EFNA1</u> | notochord formation                                  | "The formation of the notochord from the chordamesoderm. The notochord is composed of large cells packed within a firm connective tissue sheath and is found in all chordates at the ventral surface of the neural tube. In vertebrates, the notochord contributes to the vertebral column."<br>[GOC:dh, GOC:ef]                                                                                                   |
| <u>ENSG00000092969</u> | <u>TGFB2</u> | neural tube closure                                  | "The last step in the formation of the neural tube, where the paired neural folds are brought together and fuse at the dorsal midline."<br>[GOC:dph, ISBN:0878932437]                                                                                                                                                                                                                                              |
| <u>ENSG00000114251</u> | <u>WNT5A</u> | positive regulation of neuron projection development | "Any process that increases the rate, frequency or extent of neuron projection development. Neuron projection development is the process whose specific outcome is the progression of a neuron projection over time, from its formation to the mature structure. A neuron projection is any process extending from a neural cell, such as axons or dendrites (collectively called neurites)."<br>[GOC:dph, GOC:tb] |
|                        |              | neural tube closure                                  | "The last step in the formation of the neural tube, where the paired                                                                                                                                                                                                                                                                                                                                               |

|  |  |                                                              |                                                                                                                                                                                                                                                                                                                                                                                                                                    |
|--|--|--------------------------------------------------------------|------------------------------------------------------------------------------------------------------------------------------------------------------------------------------------------------------------------------------------------------------------------------------------------------------------------------------------------------------------------------------------------------------------------------------------|
|  |  |                                                              | neural folds are brought together and fuse at the dorsal midline."<br>[GOC:dph,<br>ISBN:0878932437]                                                                                                                                                                                                                                                                                                                                |
|  |  | neural tube development                                      | "The process whose specific outcome is the progression of the neural tube over time, from its formation to the mature structure. The mature structure of the neural tube exists when the tube has been segmented into the forebrain, midbrain, hindbrain and spinal cord regions. In addition neural crest has budded away from the epithelium."<br>[GO_REF:0000021,<br>GOC:cls, GOC:dgh,<br>GOC:dph, GOC:jid,<br>GOC:mtg_15jun06] |
|  |  | neuron projection morphogenesis                              | "The process in which the anatomical structures of a neuron projection are generated and organized. A neuron projection is any process extending from a neural cell, such as axons or dendrites." [GOC:mah]                                                                                                                                                                                                                        |
|  |  | planar cell polarity pathway involved in neural tube closure | "The series of molecular signals initiated by binding of a Wnt protein to a receptor on the surface of the target cell where activated receptors signal via downstream effectors that modulates the establishment of planar polarity contributing to neural tube closure."<br>[GOC:ascb_2009,<br>GOC:dph, GOC:tb]                                                                                                                  |

|                        |             |                                                                               |                                                                                                                                                                                                                                                                                              |
|------------------------|-------------|-------------------------------------------------------------------------------|----------------------------------------------------------------------------------------------------------------------------------------------------------------------------------------------------------------------------------------------------------------------------------------------|
|                        |             | melanocyte proliferation                                                      | "The multiplication or reproduction of melanocytes, resulting in the expansion of a cell population. A melanocyte is a pigment cell derived from the neural crest. It contains melanin-filled pigment granules, which give a brown to black appearance." [CL:0000148, GOC:uh, PMID:22637532] |
| <u>ENSG00000101384</u> | <u>JAG1</u> | cardiac neural crest cell development involved in outflow tract morphogenesis | "The process aimed at the progression of a cardiac neural crest cell over time, from initial commitment of the cell to its specific fate, to the fully functional differentiated cell that contributes to the shaping of the outflow tract." [GOC:dph, GOC:mtg_heart]                        |
| <u>ENSG00000090932</u> | <u>DLL3</u> | paraxial mesoderm development                                                 | "The process whose specific outcome is the progression of the paraxial mesoderm over time, from its formation to the mature structure. The paraxial mesoderm is the mesoderm located bilaterally adjacent to the notochord and neural tube." [GOC:dgh]                                       |
| <u>ENSG00000125378</u> | <u>BMP4</u> | neural tube closure                                                           | "The last step in the formation of the neural tube, where the paired neural folds are brought together and fuse at the dorsal midline." [GOC:dph, ISBN:0878932437]                                                                                                                           |
|                        |             | dorsal/ventral neural tube patterning                                         | "The process in which the neural tube is regionalized in the dorsoventral axis."                                                                                                                                                                                                             |

|                        |               |                                                            |                                                                                                                                                                                                                                                                                                                                                                                                                    |
|------------------------|---------------|------------------------------------------------------------|--------------------------------------------------------------------------------------------------------------------------------------------------------------------------------------------------------------------------------------------------------------------------------------------------------------------------------------------------------------------------------------------------------------------|
|                        |               |                                                            | [GO_REF:0000021, GOC:cls, GOC:dgh, GOC:dph, GOC:jid, GOC:mtg_15jun06, PMID:11262869]                                                                                                                                                                                                                                                                                                                               |
|                        |               | positive regulation of cardiac neural crest cell migration | "Any process that activates or increases the frequency, rate or extent of cardiac neural crest cell migration involved in outflow tract morphogenesis."<br>[GO_REF:0000058, GOC:BHF, GOC:rl, GOC:TermGenie, PMID:17628518]                                                                                                                                                                                         |
| <u>ENSG00000136244</u> | <u>IL6</u>    | positive regulation of neuron projection development       | "Any process that increases the rate, frequency or extent of neuron projection development. Neuron projection development is the process whose specific outcome is the progression of a neuron projection over time, from its formation to the mature structure. A neuron projection is any process extending from a neural cell, such as axons or dendrites (collectively called neurites)."<br>[GOC:dph, GOC:tb] |
|                        |               | neuron projection development                              | "The process whose specific outcome is the progression of a neuron projection over time, from its formation to the mature structure. A neuron projection is any process extending from a neural cell, such as axons or dendrites (collectively called neurites)."<br>[GOC:mah]                                                                                                                                     |
| <u>ENSG00000107562</u> | <u>CXCL12</u> | brain                                                      | "The process whose                                                                                                                                                                                                                                                                                                                                                                                                 |

|                        |             |                                                   |                                                                                                                                                                                                                                                                                                                                                                                                                                                                          |
|------------------------|-------------|---------------------------------------------------|--------------------------------------------------------------------------------------------------------------------------------------------------------------------------------------------------------------------------------------------------------------------------------------------------------------------------------------------------------------------------------------------------------------------------------------------------------------------------|
|                        |             | development                                       | specific outcome is the progression of the brain over time, from its formation to the mature structure. Brain development begins with patterning events in the neural tube and ends with the mature structure that is the center of thought and emotion. The brain is responsible for the coordination and control of bodily activities and the interpretation of information from the senses (sight, hearing, smell, etc.)." [GOC:dph, GOC:jid, GOC:tb, UBERON:0000955] |
| <u>ENSG00000099250</u> | <u>NRP1</u> | ventral trunk neural crest cell migration         | "The movement of trunk neural crest cells from the neural tube, travelling ventrally through the anterior half of each sclerotome. Trunk neural crest cells that remain in the sclerotome form the dorsal root ganglia containing the sensory neurons. Trunk neural crest cells that continue more ventrally form the sympathetic ganglia, the adrenal medulla, and the nerve clusters surrounding the aorta." [GOC:bf, GOC:mat, GOC:PARL, PMID:16319111, PMID:19386662] |
|                        |             | neural crest cell migration involved in autonomic | "Any neural crest cell migration that is involved in autonomic nervous system development."                                                                                                                                                                                                                                                                                                                                                                              |

|                        |              |                                    |                                                                                                                                                                                                                                                                                                                                                                                                                                                                                                                                                                                                                                                                                                                                                                                                                      |
|------------------------|--------------|------------------------------------|----------------------------------------------------------------------------------------------------------------------------------------------------------------------------------------------------------------------------------------------------------------------------------------------------------------------------------------------------------------------------------------------------------------------------------------------------------------------------------------------------------------------------------------------------------------------------------------------------------------------------------------------------------------------------------------------------------------------------------------------------------------------------------------------------------------------|
|                        |              | nervous system development         | [GOC:BHF, GOC:TermGenie]                                                                                                                                                                                                                                                                                                                                                                                                                                                                                                                                                                                                                                                                                                                                                                                             |
| <u>ENSG00000136160</u> | <u>EDNRB</u> | neural crest cell migration        | "The characteristic movement of cells from the dorsal ridge of the neural tube to a variety of locations in a vertebrate embryo."<br>[GOC:ascb_2009, GOC:dph, GOC:tb, ISBN:0878932437]                                                                                                                                                                                                                                                                                                                                                                                                                                                                                                                                                                                                                               |
|                        |              | enteric nervous system development | "The process whose specific outcome is the progression of the enteric nervous system over time, from its formation to the mature structure. The enteric nervous system is composed of two ganglionated neural plexuses in the gut wall which form one of the three major divisions of the autonomic nervous system. The enteric nervous system innervates the gastrointestinal tract, the pancreas, and the gall bladder. It contains sensory neurons, interneurons, and motor neurons. Thus the circuitry can autonomously sense the tension and the chemical environment in the gut and regulate blood vessel tone, motility, secretions, and fluid transport. The system is itself governed by the central nervous system and receives both parasympathetic and sympathetic innervation."<br>[FMA:66070, GOC:jid, |

|                        |              |                                                              |                                                                                                                                                                                                                                                                                                                                                                                                                                                                                                                                                                                                                                                                                                                                                |
|------------------------|--------------|--------------------------------------------------------------|------------------------------------------------------------------------------------------------------------------------------------------------------------------------------------------------------------------------------------------------------------------------------------------------------------------------------------------------------------------------------------------------------------------------------------------------------------------------------------------------------------------------------------------------------------------------------------------------------------------------------------------------------------------------------------------------------------------------------------------------|
|                        |              |                                                              | GOC:sr]                                                                                                                                                                                                                                                                                                                                                                                                                                                                                                                                                                                                                                                                                                                                        |
| <u>ENSG00000180340</u> | <u>FZD2</u>  | planar cell polarity pathway involved in neural tube closure | "The series of molecular signals initiated by binding of a Wnt protein to a receptor on the surface of the target cell where activated receptors signal via downstream effectors that modulates the establishment of planar polarity contributing to neural tube closure."<br>[GOC:ascb_2009, GOC:dph, GOC:tb]                                                                                                                                                                                                                                                                                                                                                                                                                                 |
| <u>ENSG00000151617</u> | <u>EDNRA</u> | enteric nervous system development                           | "The process whose specific outcome is the progression of the enteric nervous system over time, from its formation to the mature structure. The enteric nervous system is composed of two ganglionated neural plexuses in the gut wall which form one of the three major divisions of the autonomic nervous system. The enteric nervous system innervates the gastrointestinal tract, the pancreas, and the gall bladder. It contains sensory neurons, interneurons, and motor neurons. Thus the circuitry can autonomously sense the tension and the chemical environment in the gut and regulate blood vessel tone, motility, secretions, and fluid transport. The system is itself governed by the central nervous system and receives both |



|                        |              |                                                              |                                                                                                                                                                                                                                                                                                                                                                                                                                                                                             |
|------------------------|--------------|--------------------------------------------------------------|---------------------------------------------------------------------------------------------------------------------------------------------------------------------------------------------------------------------------------------------------------------------------------------------------------------------------------------------------------------------------------------------------------------------------------------------------------------------------------------------|
|                        |              |                                                              | parasympathetic and sympathetic innervation." [FMA:66070, GOC:jid, GOC:sr]                                                                                                                                                                                                                                                                                                                                                                                                                  |
| <u>ENSG00000204217</u> | <u>BMPR2</u> | brain development                                            | "The process whose specific outcome is the progression of the brain over time, from its formation to the mature structure. Brain development begins with patterning events in the neural tube and ends with the mature structure that is the center of thought and emotion. The brain is responsible for the coordination and control of bodily activities and the interpretation of information from the senses (sight, hearing, smell, etc.)." [GOC:dph, GOC:jid, GOC:tb, UBERON:0000955] |
| <u>ENSG00000164930</u> | <u>FZD6</u>  | neural tube closure                                          | "The last step in the formation of the neural tube, where the paired neural folds are brought together and fuse at the dorsal midline." [GOC:dph, ISBN:0878932437]                                                                                                                                                                                                                                                                                                                          |
| <u>ENSG00000157240</u> | <u>FZD1</u>  | planar cell polarity pathway involved in neural tube closure | "The series of molecular signals initiated by binding of a Wnt protein to a receptor on the surface of the target cell where activated receptors signal via downstream effectors that modulates the establishment of planar polarity contributing to neural tube closure."                                                                                                                                                                                                                  |

|                        |              |                                |                                                                                                                                                                                                                                                                                                                                                                                                                                                                                             |
|------------------------|--------------|--------------------------------|---------------------------------------------------------------------------------------------------------------------------------------------------------------------------------------------------------------------------------------------------------------------------------------------------------------------------------------------------------------------------------------------------------------------------------------------------------------------------------------------|
|                        |              |                                | [GOC:ascb_2009, GOC:dph, GOC:tb]                                                                                                                                                                                                                                                                                                                                                                                                                                                            |
| <u>ENSG00000077782</u> | <u>FGFR1</u> | chordate embryonic development | "The process whose specific outcome is the progression of the embryo over time, from zygote formation through a stage including a notochord and neural tube until birth or egg hatching."<br>[GOC:mtg_sensu]                                                                                                                                                                                                                                                                                |
| <u>ENSG00000170989</u> | <u>S1PR1</u> | brain development              | "The process whose specific outcome is the progression of the brain over time, from its formation to the mature structure. Brain development begins with patterning events in the neural tube and ends with the mature structure that is the center of thought and emotion. The brain is responsible for the coordination and control of bodily activities and the interpretation of information from the senses (sight, hearing, smell, etc.)." [GOC:dph, GOC:jid, GOC:tb, UBERON:0000955] |
